# Supplementary material
Source: PubMed Central journal article supplement (PMC4303083)

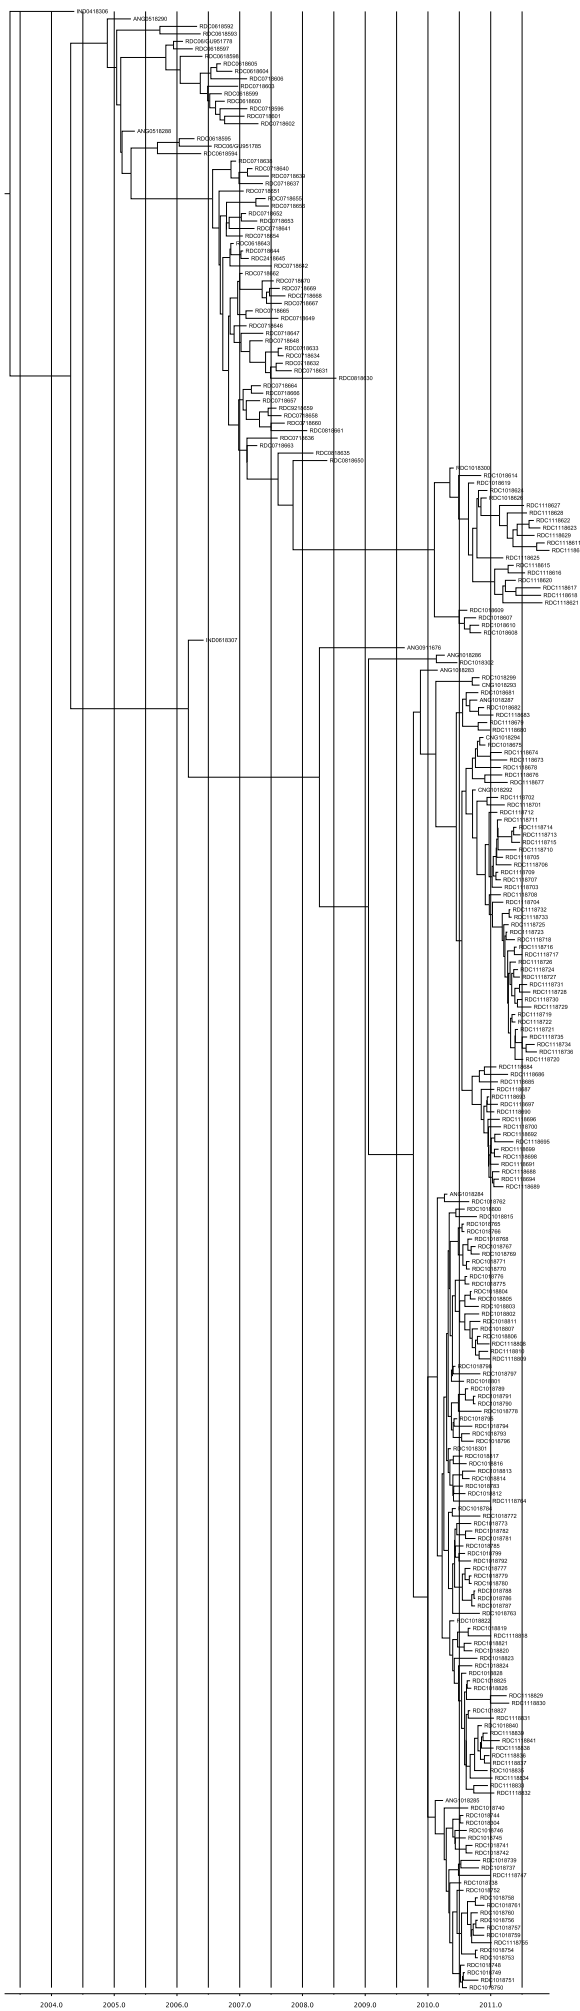

Supplement: supp_jiu375_jiu375supp.pdf [file supp_jiu375_jiu375supp.pdf]
